1  
2  
3  
4  
5  
6  
7  
8  
9  
10  
11  
12  
13  
14  
15  
16  
17  
18  
19  
20  
21  
22  
23

A Hybrid *de novo* Assembly of the Sea Pansy (*Renilla muelleri*) Genome

Justin Jiang<sup>1</sup>, Andrea M. Quattrini<sup>1\*</sup>, Warren R. Francis<sup>2</sup>, Joseph F. Ryan<sup>3</sup>, Estefanía Rodríguez<sup>4</sup>,  
Catherine S. McFadden<sup>1</sup>

<sup>1</sup>Department of Biology, Harvey Mudd College, 1250 N. Dartmouth Ave, Claremont, CA 91711,  
USA

<sup>2</sup>University of Southern Denmark, Dept. of Biology, Campusvej 55, Odense M 5230, Denmark

<sup>3</sup>Whitney Laboratory for Marine Bioscience, University of Florida, 9505 Ocean Shore Blvd.  
St. Augustine, FL 32080, USA

<sup>4</sup>Division of Invertebrate Zoology, American Museum of Natural History, Central Park West at  
79th Street, New York, NY 10024, USA

Justin Jiang: [jjiang990@gmail.com](mailto:jjiang990@gmail.com)  
Andrea Quattrini: [aquattrini@g.hmc.edu](mailto:aquattrini@g.hmc.edu)  
Warren R. Francis: [wfrancis@biology.sdu.dk](mailto:wfrancis@biology.sdu.dk)  
Joseph F. Ryan: [joseph.ryan@whitney.ufl.edu](mailto:joseph.ryan@whitney.ufl.edu)  
Estefanía Rodríguez: [erodriguez@amnh.org](mailto:erodriguez@amnh.org)  
Catherine S. McFadden: [mcfadden@g.hmc.edu](mailto:mcfadden@g.hmc.edu)

\*Corresponding Author

24 **Abstract**

25 **Background:** Over 3,000 species of octocorals (Cnidaria, Anthozoa) inhabit an expansive range  
26 of environments, from shallow tropical seas to the deep-ocean floor. They are important  
27 foundation species that create coral “forests” which provide unique niches and three-dimensional  
28 living space for other organisms. The octocoral genus *Renilla* inhabits sandy, continental shelves  
29 in the subtropical and tropical Atlantic and eastern Pacific Oceans. *Renilla* is especially  
30 interesting because it produces secondary metabolites for defense, exhibits bioluminescence, and  
31 produces a luciferase that is widely used in dual-reporter assays in molecular biology. Although  
32 several cnidarian genomes are currently available, the majority are from hexacorals. Here, we  
33 present a *de novo* assembly of the *R. muelleri* genome, making this the first complete draft  
34 genome from an octocoral.

35 **Findings:** We generated a hybrid *de novo* assembly using the Maryland Super-Read Celera  
36 Assembler v.3.2.6 (MaSuRCA). The final assembly included 4,825 scaffolds and a haploid  
37 genome size of 172 Mb. A BUSCO assessment found 88% of metazoan orthologs present in the  
38 genome. An Augustus *ab initio* gene prediction found 23,660 genes, of which 66% (15,635) had  
39 detectable similarity to annotated genes from the starlet sea anemone, *Nematostella vectensis*, or  
40 to the Uniprot database. Although the *R. muelleri* genome is smaller (172 Mb) than other  
41 publicly available, hexacoral genomes (256-448 Mb), the *R. muelleri* genome is similar to the  
42 hexacoral genomes in terms of the number of complete metazoan BUSCOs and predicted gene  
43 models.

44 **Conclusions:** The *R. muelleri* hybrid genome provides a novel resource for researchers to  
45 investigate the evolution of genes and gene families within Octocorallia and more widely across

46 Anthozoa. It will be a key resource for future comparative genomics with other corals and for  
47 understanding the genomic basis of coral diversity.

48

49 Keywords: octocoral, hybrid assembly, gene prediction, Augustus, PacBio, MaSuRCA

50

## 51 **Data Description**

### 52 *Organism Description*

53 Octocorallia is a subclass of Anthozoa (Phylum: Cnidaria) that is comprised of three  
54 orders: Alcyonacea, Helioporacea, and Pennatulacea [1]. The Pennatulacea, commonly known as  
55 sea pens, are a monophyletic group [1, 2] and are the most morphologically distinct group of  
56 octocorals [1, 3]. Sea pens differ from other octocorals by exhibiting the most integrated colonial  
57 behavior, with colonies arising from an axial polyp that develops into a peduncle—used to  
58 anchor the animal into soft-sediments or onto hard surfaces—and a rachis that supports  
59 secondary polyps [1, 3-4]. There are 14 valid families of Pennatulacea distinguished by the  
60 arrangement of the secondary polyps around the rachis [1, 4]. The monogeneric family  
61 Renillidae Lamarck, 1816 consists of seven species [5], unique because of their foliate colony  
62 growth form [1, 4].

63 *Renilla* is found naturally on sandy, shallow sea floors along the Atlantic and Pacific  
64 coasts of North and South America [3, 4, 6]. The brilliant bioluminescence and endogenous  
65 fluorescence of these animals have led to them becoming important organisms in microscopy  
66 and molecular biology. Isolated originally from *R. reniformis*, the enzyme luciferase (Renilla-  
67 luciferin 2-monooxygenase) is used in dual luciferase reporter assays, which are commonly used  
68 to study gene regulation and expression, signaling pathways, and the structure of regulatory

69 genes [7-8]. The green fluorescent protein from *Renilla* has medical applications as well as  
70 general molecular biology and imagery uses [9]. In addition, the compounds produced by *Renilla*  
71 for chemical defense [10] may be important sources for discovery of marine natural products  
72 [11]. Thus, a genome of the octocoral *Renilla* is highly valuable to the scientific community,  
73 providing a novel resource that has a range of important uses— from molecular biology to  
74 comparative genomics.

75         Due to the known difficulties of resolving lengthy repeat regions with Illumina-only data  
76 [12-13], we used a hybrid assembly approach [13-14], combining long-read Pacific Biosciences  
77 (PacBio) data with short-read Illumina data. Studies have shown that a hybrid approach results in  
78 a more complete assembly with less genome fragmentation [15-17]. Our hybrid approach used  
79 low coverage PacBio reads (15x coverage) along with high coverage Illumina HiSeq reads (105x  
80 coverage) to assemble a draft genome of *R. muelleri* Schultze in Kölliker, 1872, a sea pen  
81 common to shallow waters of the Gulf of Mexico [6].

82

## 83 **Methods and Results**

### 84 *Data Collection*

85         A live specimen of *R. muelleri* was obtained from Gulf Specimen Marine Lab (Panacea,  
86 FL, USA), which collects specimens off the panhandle of Florida in the Gulf of Mexico. Upon  
87 receiving the specimen, it was flash frozen in liquid nitrogen. Genomic DNA was then extracted  
88 using a modified CTAB protocol [18]. A total of 5.6 µg of DNA was sent to Novogene  
89 (Sacramento, CA, USA) for library preparation and sequencing. 350 bp insert DNA libraries that  
90 were PCR free were prepared and then multiplexed with other organisms on two lanes of an  
91 Illumina HiSeq 2500 (150 bp PE reads). In addition, Illumina MiSeq and PacBio sequencing

92 were performed at the Weill Cornell Medicine Epigenomics Core Facility in New York. For the  
93 Illumina MiSeq run, the *Renilla* library was prepared with TruSeq LT and then multiplexed with  
94 eight other corals and sequenced (300 bp PE reads, MiSeq v3 Reagent kit). For PacBio  
95 sequencing, a DNA library was prepared from 5 ug of DNA using the SMRTbell template prep  
96 kit v 1.0. Sequencing was carried out on 10 SMRT cells on a RSII instrument using P6-C4  
97 chemistry. PacBio SMRT Analysis 2.3 subread filtering module was used to produce the subread  
98 files for assembly.

99 As part of another study, we sequenced total RNA from a congeneric species, *R.*  
100 *reniformis*. The specimen was collected alive on the beach in North Flagler County, Florida,  
101 USA. RNA was extracted from the whole adult colony and sequenced on a NextSeq500 (150 bp  
102 PE reads) instrument. Library preparation and sequencing were performed at the University of  
103 Florida's Interdisciplinary Center for Biotechnology.

104

#### 105 *DNA Read Processing*

106 A total of 246,744,426 PE reads were obtained from the HiSeq and 6,725,072 PE reads  
107 were obtained from the MiSeq. In total, we generated 39,029,185,500 bases of Illumina data.  
108 Adapters were trimmed from all raw Illumina reads using Trimmomatic v.0.35  
109 (*ILLUMINACLIP:2:30:10 LEADING:5 TRAILING:5 SLIDINGWINDOW:4:20 MINLEN:3*;  
110 Trimmomatic, RRID:SCR\_011848) [19], resulting in 38.98 Gb of reads. These reads were then  
111 filtered with Kraken v.1.0 (Kraken, RRID:SCR\_005484) [20] using the MiniKraken 8GB  
112 database [21] to screen for possible microbial, viral and archaeal contamination. A total of 960  
113 Mb were removed from the read files, resulting in 36.23 Gb of 150 bp reads and 1.79 Gb of 300  
114 bp reads.

115 A total of 1,227,306 PacBio subreads were obtained and screened against the NCBI  
116 environmental nucleotide database (env\_nt.00 to env\_nt.23) [22] using BLASTn v.2.2.31 (-  
117 *evaluate le-10, -out\_fmt 5*, RRID:SCR\_001598) [23] to identify reads with environmental  
118 contaminants. The subreads that did not contain contaminants were extracted using  
119 MEtaGenome ANalyzer v.6.4.16 (MEGAN, RRID:SCR\_011942) [24-25], resulting in 5.22 Gb  
120 in 1,195,521 reads.

121

### 122 *RNA-Seq Read Processing*

123 We generated 119,604,588 PE reads of RNA-Seq data. We used Trimmomatic (version  
124 0.36 (-phred33, ILLUMINACLIP:/usr/local/Trimmomatic-0.32/adapters/TruSeq3-  
125 PE.fa:2:30:12:1:true, MINLEN:36; Trimmomatic, RRID:SCR\_011848) [19] to remove Illumina  
126 adapters. Trinity v 2.4.0 (--seqType fq --max\_memory 250G --CPU 6 --left trim.R1.fq --right  
127 trim.R2.fq --full\_cleanup; Trinity RRID\_SCR:013048) [26] was used to assemble the  
128 transcriptome.

129

### 130 *Hybrid Genome Assembly*

131 Two hybrid *de novo* assemblies were performed, one with the Maryland Super-Read  
132 Celera Assembler v.3.2.6 (MaSuRCA, RRID:SCR\_010691) [27] and the other with SPAdes  
133 v.3.11.0 (SPAdes, RRID:SCR\_000131; *k-mer lengths 21,33,55,77*) [28]. The Benchmarking  
134 Universal Single-Copy Orthologs v.3.0.2 (BUSCO, RRID:SCR\_015008) [29] program with  
135 default settings was used to screen the *Renilla* genome assemblies for 978 orthologs from the  
136 Metazoan dataset as a method to evaluate the completeness of each assembly. BUSCO used  
137 BLAST v.2.2.31 [23] and HMMER v.3.1.b2 (HMMER, RRID:SCR\_005305) [30] in its pipeline.

138 The stats.sh program from BBMAP v.36.14 (bbmap) [31] was used to generate general assembly  
139 statistics for genomes produced by both programs (Table 1).

140 The MaSuRCA assembly resulted in a 147-fold decrease in the number of scaffolds  
141 generated, and a 70-fold increase in the N50 contig size (70.522 KB) as compared to the SPades  
142 assembly (1.007 KB); it also had more complete BUSCOs present (Table 1). Other statistics also  
143 indicate that the MaSuRCA assembly is much less fragmented than the SPAdes assembly (Table  
144 1). Therefore, we used the MaSuRCA assembly in further analyses.

145 To improve the quality of the draft MaSuRCA assembly, six iterations of Pilon v.1.21  
146 (Pilon, RRID:SCR\_014731) [32] were used to fix assembly errors and fill assembly gaps.  
147 Bowtie2 v.2.3.2 (Bowtie2, RRID:SCR\_016368) [33] was used to align Illumina HiSeq and  
148 Illumina MiSeq genomic reads to the draft assembly, and the resulting alignments were input to  
149 Pilon, which was run on default settings. A total of 52,668 SNPs were corrected, along with  
150 14,702 small insertions and 11,841 small deletions (Supplementary Table S1).

151 To remove haploid contigs that were not merged during assembly, we ran BLASTn  
152 against the contigs themselves (*-max\_target\_seqs 10, -evalue 1e-40*) to find contigs that were  
153 highly similar. The custom script *haplotypeblastn.py* version 1.0 [34] filtered the BLASTn  
154 results by flagging matches that were greater than 75% identical and longer than 500 bp in  
155 length. The contigs that were identified as unmerged were subsequently removed using the  
156 *select\_contigs.pl* script [35]. A total of 59 scaffolds, which amounted to 67 contigs and 384 kb,  
157 were removed from the assembly.

158 The bbmap program stats.sh was used to generate assembly statistics on the haplotype-  
159 removed assembly [i.e., “final assembly”, (Table 1)]. BUSCO analysis using the metazoan  
160 orthologs was again used to estimate the completeness of the final assembly, with the flag *-long*

161 to produce higher quality training data for the downstream annotation. 857 (87.63%) orthologs  
162 were present in the final assembly (Table 1). This final *R. muelleri* assembly was masked, using  
163 RepeatMasker v.open-4.0.6 (*-species eukaryota -gccalc -div 50*; RepeatMasker,  
164 RRID:SCR\_012954) [36], for downstream gene annotation. The final annotation consists of  
165 172,512,580 bp in 4,925 scaffolds.

166

### 167 *Genome Annotation*

168 Stampy v.1.0.31 (Stampy, RRID:SCR\_005504) [37] was used to align 18.06 Gb of RNA-  
169 Seq data from *R. reniformis* to the masked genome to generate intron hints. The resulting bam  
170 file was processed by filtering out raw alignments using *filterBam* [38] per the recommended  
171 Augustus procedures [39]. A total of 1,837,637 intron hints were generated.

172 Augustus v.3.3 (*--UTR=off --allow\_hinted\_splicesites=atac --alternatives-from-*  
173 *evidence=true*; Augustus, RRID:SCR\_008417) [40] was used to predict a gene model for *R.*  
174 *muelleri*. Augustus training was performed with the hint data from *R. reniformis*, as it has been  
175 shown to improve *ab initio* predictions [40-41]. The BUSCO-generated training data was also  
176 included to help predict a gene model. A modified extrinsic weight file was used in Augustus to  
177 penalize predicted introns that were unsupported by hint evidence and reward predicted introns  
178 that were supported by hint evidence by 1e2.

179 Augustus predicted 23,660 genes that had an average exon length of 249 bp and an  
180 average intron length of 524 bp as calculated by *gfstats.py* [42] (Table 2). BUSCO with the  
181 metazoan lineage (*-m prot*) orthologs was used to assess the quality of the prediction, finding  
182 84.87% (830/978) orthologs (Table 2).

183



184 *Functional Annotations*

185 BLASTp v.2.2.31+ (-*evaluate 1e-10 -seg yes -soft\_masking true -lcase\_masking*, BLASTp,  
186 RRID:SCR\_001010) [23] was used to map the predicted gene models of *R. muelleri* to filtered  
187 protein models of another anthozoan, the sea anemone, *Nematostella vectensis* (Joint Genome  
188 Institute, JGI, v 1.0) [43]. A total of 63% (14,931) of the predicted genes (23,660) mapped to *N.*  
189 *vectensis* proteins (27,273). A custom python script, *filterGenes.py* [44] was used to filter the  
190 matches by selecting the highest bit score; in cases where bit scores were identical, the match  
191 with the highest percent length of all matches was used as a tiebreaker. Of the 14,931 genes that  
192 mapped to *N. vectensis* proteins, 12,279 genes were annotated with GO function, KOG function  
193 and/or InterPro domains; 8,101 genes were assigned GO terms; 11,067 genes were assigned  
194 KOG functions; and 10,126 genes were assigned InterPro domains (Supplemental File 1). The  
195 8,729 genes that did not hit *N. vectensis* proteins were remapped with BLASTp using a lower e-  
196 value (*1e-5*) and filtered with the aforementioned python script with the same settings; an  
197 additional 2,002 of the genes mapped to *N. vectensis*. Of these, 1,512 genes were annotated with  
198 GO functions, KOG functions and/or InterPro domains (Supplemental File 1). The remaining  
199 6,727 genes that did not match *N. vectensis* annotations were mapped to the UniProt database  
200 (UniProt, RRID:SCR\_002380) [45-46] with BLASTp (-*evaluate 1e-5*), and 1,844 of these were  
201 assigned a UniProt function. In total, 79.36% (18,777/23,660) of the predicted gene models were  
202 mapped to either *N. vectensis* predicted proteins or the UniProt database, and 66.08%  
203 (15,635/23,660) of the predicted *Renilla* genes have either functional annotations or InterPro  
204 domain information associated with them.

205 We also used BLASTp (-*evaluate 1e-10 -seg yes -soft\_masking true -lcase\_masking*) to  
206 map the predicted genes against a newer *N. vectensis* dataset that was generated using RNA-Seq

207 (hereafter called the Vienna dataset) [47-48]. A total of 63% (15,001) of the predicted genes  
208 (23,660) mapped to the Vienna dataset (25,729) (Supplemental File 2). As above, the predicted  
209 genes that did not map were remapped with a lower e-value ( $1e-5$ ), resulting in 2,071 additional  
210 predicted genes mapping to the *N. vectensis* Vienna dataset. In total, 72.15% (17,072) of  
211 predicted genes mapped to the Vienna dataset. This dataset did not have associated functional  
212 annotations. Combining all gene model annotation methods, 79.82% (18,886) of genes from the  
213 Augustus gene model were mapped to the JGI *N. vectensis* annotations, the *N. vectensis* Vienna  
214 dataset, or the UniProt database (Supplemental Files 1-3).

215

### 216 *Genome Assembly Comparisons*

217 We compared the *R. muelleri* genome assembly to previously published anthozoan (e.g.,  
218 corals, anemones) genomes using a variety of assessment statistics (Supplemental Table S2).  
219 BUSCO was used (*-m geno*) to assess the completeness of six hexacoral genomes and a draft *R.*  
220 *reniformis* genome and compare these results to the hybrid *R. muelleri* assembly (Fig. 1). We  
221 found the BUSCO-completeness of our *R. muelleri* assembly (857) to be more similar to the  
222 well-curated assembly of the model organism *N. vectensis* (893) [49-50] than to the other  
223 anthozoans. BUSCOs from the other five hexacoral genomes were less complete, with complete  
224 BUSCOs ranging from 728 (*Acropora digitifera*) to 839 (*Discosoma* sp.) [50-57]. Only 800  
225 complete BUSCOs were recovered from the other hybrid assembly, the hexacoral *Montastraea*  
226 *cavernosa* [57]. The only other publicly-available octocoral genome, *R. reniformis*, had  
227 considerably fewer complete BUSCOs (356, Fig.1) [58].

228 The number of predicted genes was highly similar across all anthozoan genomes  
229 (Supplementary Table S2). The range of predicted genes was 21,372 to 30,360 across the six

230 hexacorals. The number of predicted genes (23,360) for *R. muelleri* was similar to the 23,668  
231 genes predicted for *A. digitifera*.

232 Interestingly, the genome size of *R. muelleri* is considerably smaller (172 Mb) than other  
233 hexacoral genomes (256-448 Mb). Of the hexacorals, the anemone *Exaiptasia pallida* has the  
234 smallest genome size of 256 Mb, while the others have genome sizes >300 Mb. As indicated by  
235 [56], *E. pallida* has smaller and less frequent introns. Similar to *E. pallida*, exon sizes were  
236 larger in *R. muelleri* (249 bp) compared to the hexacorals (208 to 230 bp). These results suggest  
237 that there may be comparatively fewer non-coding regions in *R. muelleri* because the number of  
238 predicted gene models in *R. muelleri* is similar to hexacorals, yet the exon sizes are larger and  
239 the genome size is smaller in *R. muelleri*. In addition, repetitive elements in the *R. muelleri*  
240 genome may be less frequent, however, this remains to be further examined.

241 We also compared the mitochondrial genome to the previously published mitogenome of  
242 *R. muelleri* [59]. We used BLASTn to search for the mitogenome among the contigs (included as  
243 the last contig in the assembly) and recovered the entire 18,641 bp circularized, mitogenome.  
244 Compared to the published mitogenome, there were just two, single bp differences and one bp  
245 indel.

246

## 247 **Conclusions**

248 We present the first octocoral genome assembly and showcase the feasibility of the  
249 MaSuRCA hybrid assembler for marine invertebrate genomics. The *R. muelleri* genome is one of  
250 the smallest anthozoan genomes discovered to date, yet it is comparable to other coral and  
251 anemone genomes in terms of predicted gene models. The identification of 88% of complete  
252 metazoan BUSCOs in the *R. muelleri* genome highlights that a quality genome assembly can be

253 obtained from relatively low coverage sequencing of short and long read data. Although more  
254 data are needed to further increase size and reduce number of scaffolds, and further functional  
255 annotation is needed, the genome of the sea pansy, *R. muelleri*, provides a novel resource for the  
256 scientific community to further investigations of gene family evolution, comparative genomics,  
257 and the genomic basis of coral diversity.

258

### 259 **Availability of supporting data**

260 The final hybrid assembly and predicted proteins generated by this study are in the *GigaDB*  
261 repository [60] and on the reefgenomics website [61]. Raw Illumina and PacBio reads are  
262 available in NCBI's Sequence Read Archive (PRJNA491947). RNA-Seq reads have been  
263 uploaded to the European Nucleotide Archive (PRJEB28688).

264

### 265 **Abbreviations**

266 bp: base pair, BUSCO: Benchmarking Universal Single-Copy Orthologs, Gb: gigabp,  
267 Mb: megabp, MY: million years, PE: paired end, Pacbio: Pacific Biosciences

268

### 269 **Additional Files**

270 **Supplementary Table S1.** Summary of Pilon changes per iteration

271 **Supplemental Table S2.** *Renilla muelleri* genome assembly and annotation comparisons to  
272 other anthozoan genomes.

273 **Supplemental File 1.** Gene model annotations of *Renilla muelleri* using the *Nematostella*

274 *vectensis* Joint Genome Institute filtered protein model.

275 **Supplemental File 2.** Gene annotations of *Renilla muelleri* using the *Nematostella vectensis*

276 Vienna dataset.

277 **Supplemental File 3.** Reference file that includes annotations for the predicted gene models.

278 This dataset includes GO terms, KOG IDs, and InterPro domains as annotated in the

279 *Nematostella vectensis* filtered protein models (Joint Genome Institute).

280

### 281 **Competing interests**

282 The authors declare no competing interests.

283

### 284 **Funding**

285 This study was funded by NSF-DEB Award 1457817 to C.S. McFadden and NSF-DEB Award

286 1457581 to E. Rodriguez. Additional funding came from startup funds from the University of

287 Florida DSP Research Strategic Initiatives #00114464 and University of Florida Office of the

288 Provost Programs to J.F. Ryan.

289

### 290 **Authors' Contributions**

291 **Justin Jiang:** Conceptualization, Investigation, Formal Analysis, Software Programming,

292 Methodology, Validation, Data Curation, Writing - Original Draft Preparation, Writing - Review

293 & Editing, Visualization

294 **Andrea M. Quattrini:** Conceptualization, Supervision, Investigation, Formal Analysis,

295 Methodology, Validation, Data Curation, Writing - Original Draft Preparation, Writing - Review

296 & Editing, Visualization

297 **Warren R. Francis:** Software Programming, Methodology, Validation, Writing - Review &

298 Editing

299 **Joseph F. Ryan:** Methodology, Validation, Data Curation, Writing - Review & Editing

300 **Estefania Rodriguez:** Conceptualization, Writing - Review & Editing

301 **Catherine S. McFadden:** Conceptualization, Supervision, Writing - Original Draft Preparation,  
302 Writing - Review & Editing

303

### 304 **Acknowledgements**

305 We thank N. Alexander, C. Mason, and the Weill Cornell Medicine Epigenetics Core Facility  
306 and staff for MiSeq and PacBio sequencing. Thanks to M. Brugler, C. Schnitzler, and S. Herrera  
307 for advice. B. Macdonald generated the filterGenes.py script. We thank M. Heloski for collection  
308 of *Renilla reniformis* sample used for RNA-Seq.

309

### 310 **References**

- 311 1. Daly M, Brugler MR, Cartwright P et. al. The phylum Cnidaria: A review of  
312 phylogenetic patterns and diversity 300 years after Linnaeus. *Zootaxa*. 2007;1668:127-  
313 182.
- 314 2. McFadden CS, France SC, Sánchez JA et. al. A molecular phylogenetic analysis of the  
315 Octocorallia (Cnidaria: Anthozoa) based on mitochondrial protein-coding sequences.  
316 *Molecular Phylogenetics and Evolution*. 2006;41(3):513:527.
- 317 3. Williams GC. The global diversity of sea pens (Cnidaria: Octocorallia: Pennatulacea).  
318 *PLoS One*. 2011;6:e22747
- 319 4. Williams GC. Living genera of sea pens (Coelenterata: Octocorallia: Pennatulacea):  
320 illustrated key and synopsis. *Zoological Journal of the Linnean Society*. 1995;113:93-  
321 140.

- 322 5. World Register of Marine Species: World List of Octocorallia Renillidae.  
323 <http://marinespecies.org/aphia.php?p=taxdetails&id=266953>, Accessed 19 Aug 2018.
- 324 6. Cairns SD, Bayer FM. Octocorallia (Cnidaria) of the Gulf of Mexico. In: Felder DL,  
325 Camp DK, editors. Gulf of Mexico—Origins, Waters, and Biota. Volume 1.  
326 Biodiversity. College Station, Texas: Academic; 2009:321-331.
- 327 7. Sherf BA, Navarro SL, Hannah RR, Wood KV. Dual-luciferase reporter assay: an  
328 advanced co-reporter technology integrating firefly and Renilla luciferase  
329 assays. Promega Notes. 1996;56:2.
- 330 8. Saito K, Chang YF, Horikawa K et al. Luminescent Proteins for High-Speed Single-Cell  
331 and Whole-Body Imaging. Nature Communications. 2012; doi:10.1038/ncomms2248.
- 332 9. Stepanenko OV, Verkhusha VV, Kuznetsova IM, Uversky VN, Turoverov KK. Current  
333 Protein & Peptide Science. 2008; doi:10.2174/138920308785132668
- 334 10. Clavico EE, De Souza AT, Da Gama BA, Pereira RC. Antipredator defense and  
335 phenotypic plasticity of sclerites from *Renilla muelleri*, a tropical sea pansy. The  
336 Biological Bulletin, 2007;213(2):135-140.
- 337 11. Ledoux JB, Antunes A. Beyond the beaten path: improving natural products  
338 bioprospecting using an eco-evolutionary framework—the case of the octocorals. Critical  
339 Reviews in Biotechnology. 2018;38(2):184-198.
- 340 12. Pop M, Salzberg SL. Bioinformatics challenges of new sequencing technology. Trends in  
341 Genetics. 2008;24(3):142-149.
- 342 13. Koren S, Schatz MC, Walenz BP, Martin J, Howard JT, Ganapathy G, Phillippy AM.  
343 Hybrid error correction and de novo assembly of single-molecule sequencing  
344 reads. Nature biotechnology, 2012;30(7):693.

- 345 14. English AC, Richards S, Han Y et al. Mind the gap: Upgrading genomes with Pacific  
346 Biosciences RS long-read sequencing technology. PLoS ONE. 2012;  
347 doi:10.1371/journal.pone.0047768.
- 348 15. Bashir A, Klamer AA, Robins WP et al. A hybrid approach for the automated finishing of  
349 bacterial genomes. Nature Biotechnology. 2012; doi:10.1038/nbt.2288.
- 350 16. Giordano F, Aigrain L, Quail MA et al. De novo yeast genome assemblies from MinION,  
351 PacBio and MiSeq platforms. Scientific Reports. 2017; doi:10.1038/s41598-017-03996-z.
- 352 17. Tan MH, Austin CM, Hammer MP et al. Finding Nemo: hybrid assembly with Oxford  
353 Nanopore and Illumina reads greatly improves the clownfish (*Amphiprion ocellaris*)  
354 genome assembly. GigaScience. 2018; doi:10.1093/gigascience/gix137.
- 355 18. McFadden CS, Alderslade P, Ofwegen LP van, Johnsen H, Rusmevichientong A.  
356 Phylogenetic relationships within the tropical soft coral genera *Sarcophyton* and  
357 *Lobophytum* (Anthozoa, Octocorallia). Invertebrate Biology 2006;125:288-305.
- 358 19. Bolger AM, Lohse M, Usadel B. Trimmomatic: a flexible trimmer for Illumina sequence  
359 data. Bioinformatics 2014;30(15):2114–20.
- 360 20. Wood DE, Salzberg SL. Kraken: ultrafast metagenomic sequence classification using  
361 exact alignments. Genome Biology. 2014;15(3):R46.
- 362 21. Wood DE. Minikraken 8 GB database, Johns Hopkins University,  
363 [https://ccb.jhu.edu/software/kraken/dl/minikraken\\_20171019\\_8Gb.tgz](https://ccb.jhu.edu/software/kraken/dl/minikraken_20171019_8Gb.tgz) (August 7 2018,  
364 date last accessed)
- 365 22. National Center for Biotechnology Information: Trivial HTTP: env\_nt.00 to env\_nt.23.  
366 ftp://ftp.ncbi.nlm.nih.gov/blast/db/



- 367 23. Boratyn GM, Camacho C, Cooper PS et al. BLAST: a more efficient report with usability  
368 improvements. *Nucleic Acids Research* 2013;41(W1):W29–33.
- 369 24. Huson DH, Mitra S, Ruscheweyh HJ et al. Integrative analysis of environmental  
370 sequences using MEGAN4, *Genome Research*, 2011;21:1552-1560.
- 371 25. Huson DH, Auch AF, Qi J et al. MEGAN analysis of metagenomic data, *Genome*  
372 *Research*, 2007;17(3):377-86.
- 373 26. Haas BJ, Papanicolaou A, Yassour M, Grabherr M, Blood PD, Bowden J, MacManes  
374 MD. De novo transcript sequence reconstruction from RNA-seq using the Trinity  
375 platform for reference generation and analysis. *Nature protocol*. 2013;8(8):1494.
- 376 27. Zimin AV, Marçais G, Puiu D et al. The MaSuRCA genome assembler. *Bioinformatics*  
377 2013;29(21):2669–77.
- 378 28. Bankevich A, Nurk S, Antipov D, et al. SPAdes: A New Genome Assembly Algorithm  
379 and Its Applications to Single-Cell Sequencing; *Journal of Computational Biology*. 2012;  
380 doi:[10.1089/cmb.2012.0021](https://doi.org/10.1089/cmb.2012.0021)
- 381 29. Simão FA, Waterhouse RM, Ioannidis P et al. BUSCO: Assessing Genome Assembly  
382 and Annotation Completeness with Single-Copy Orthologs. *Bioinformatics*. 2015;  
383 doi:[10.1093/bioinformatics/btv351](https://doi.org/10.1093/bioinformatics/btv351).
- 384 30. Finn RD, Clements J, Eddy SR et al. HMMER Web Server: Interactive Sequence  
385 Similarity Searching. *Nucleic Acids Research*. 2011; doi:[10.1093/nar/gkr367](https://doi.org/10.1093/nar/gkr367).
- 386 31. Bushnell B. BBMap Short Read Aligner. Berkeley, CA: University of California; 2016.  
387 <https://sourceforge.net/projects/bbmap/> (August 7 2018, date last accessed).

- 388 32. Walker BJ, Abeel T, Shea T et al. Pilon: an integrated tool for comprehensive microbial  
389 variant detection and genome assembly improvement. PLoS One. 2014;  
390 doi:[10.1371/journal.pone.0112963](https://doi.org/10.1371/journal.pone.0112963)
- 391 33. Langmead B, Salzberg SL. Fast Gapped-Read Alignment with Bowtie 2. Nature  
392 Methods. 2012; doi:10.1038/nmeth.1923.
- 393 34. Francis WR *haplotypeblastn.py*;  
394 [https://bitbucket.org/wrf/sequences/raw/f23b4dd3c965cc1774b9e10eb433242a18c13c65/  
395 haplotypeblastn.py](https://bitbucket.org/wrf/sequences/raw/f23b4dd3c965cc1774b9e10eb433242a18c13c65/haplotypeblastn.py) (August 7 2018, date last accessed).
- 396 35. Hahn C *select\_contigs.pl*; [https://github.com/chrishah/phylog/blob/master/scripts-  
397 external/select\\_contigs.pl](https://github.com/chrishah/phylog/blob/master/scripts-external/select_contigs.pl) (August 7 2018, date last accessed).
- 398 36. Smit AFA, Hubley R, Green P. RepeatMasker; <http://repeatmasker.org>
- 399 37. Lunter G, Goodson M. Stampy: a statistical algorithm for sensitive and fast mapping of  
400 Illumina sequence reads. Genome Research. 2011;21(6):936-939.
- 401 38. Pena-Centeno T; *filterBam*,  
402 <https://github.com/nextgenusfs/augustus/tree/master/auxprogs/filterBam>
- 403 39. [https://computationalbiologysite.wordpress.com/2013/07/25/incorporating-rnaseq-tophat-  
404 to-augustus](https://computationalbiologysite.wordpress.com/2013/07/25/incorporating-rnaseq-tophat-to-augustus), (August 7 2018, date last accessed).
- 405 40. Stanke M, Steinkamp R, Waack S et al. AUGUSTUS: a web server for gene finding in  
406 eukaryotes. Nucleic Acids Research 2004;32(suppl-2):W309-12.
- 407 41. Stanke M, Schöffmann O, Morgenstern B, Waack S. Gene prediction in eukaryotes with  
408 a generalized hidden Markov model that uses hints from external sources. BMC  
409 Bioinformatics. 2006; doi:10.1186/1471-2105-7-62.

- 410 42. Francis WR, Wörheide G. Similar ratios of introns to intergenic sequence across animal  
411 genomes. *Genome Biology and Evolution*; 2017;9(6):1582-1598.
- 412 43. Joint Genomics Institute: Trivial HTTP, Nemve1.  
413 <https://genome.jgi.doe.gov/portal/Nemve1/Nemve1.download.ftp.html> (7 August 2018,  
414 date last accessed)
- 415 44. Macdonald B. filterGenes.py.  
416 <https://github.com/mcfaddenlab/filterGenes.py/blob/master/README.md> (August 7,  
417 2018, date last accessed)
- 418 45. Uniprot Consortium. UniProt: the Universal Protein Knowledgebase. *Nucleic Acids*  
419 *Research*. 2018; doi:10.1093/nar/gky092
- 420 46. UniProt Consortium, Reviewed Swiss-Prot data,  
421 [ftp://ftp.uniprot.org/pub/databp/uniprot/current\\_release/knowledgebase/complete/uniprot](ftp://ftp.uniprot.org/pub/databp/uniprot/current_release/knowledgebase/complete/uniprot)  
422 [\\_sprot.fasta.gz](ftp://ftp.uniprot.org/pub/databp/uniprot/current_release/knowledgebase/complete/uniprot) (August 7, 2018, date last accessed)
- 423 47. <https://ndownloader.figshare.com/files/1215191>, (August 7 2018, date last accessed).
- 424 48. Moran Y, Fredman D, Praher D et al. Cnidarian MicroRNAs frequently regulate targets  
425 by cleavage. *Genome Research*. 2014; doi:10.1101/gr.162503.113.
- 426 49. Joint Genome Institute. *Nematostella vectensis* genome. Version 1.  
427 <https://genome.jgi.doe.gov/portal/Nemve1/Nemve1.download.html> (August 7, 2018, date  
428 last accessed).
- 429 50. Putnam NH, Srivastava M, Hellsten U, Dirks B, Chapman J, Salamov, A, et al. Sea  
430 anemone genome reveals ancestral eumetazoan gene repertoire and genomic  
431 organization. *Science* 2007;317(5834):86-94.

- 432 51. Shinzato C, Shoguchi E, Kawashima T et al. National Center for Biotechnology  
433 Information, *Acropora digitifera* genome Version 1.  
434 <https://www.ncbi.nlm.nih.gov/nucore/BACK00000000.1> (November 2015, date last  
435 accessed).
- 436 52. Shinzato C, Shoguchi E, Kawashima T, et al. Using the *Acropora digitifera* genome to  
437 understand coral responses to environmental change. *Nature*. 2011;476:7360-320.
- 438 53. Liew YJ, Aranda M, Voolstra CR. Reefgenomics.Org - a repository for marine genomics  
439 data. Database (Oxford) 2016, 1–4 *Amplexidiscus fenestrafer* and *Discosoma* sp.  
440 genomes. <http://corallimorpharia.reefgenomics.org> (August 7, 2018, date last accessed).
- 441 54. Wang X, Liew YJ, Li Y, Zoccola D, Tambutte S, Aranda M. Draft genomes of the  
442 corallimorpharians *Amplexidiscus fenestrafer* and *Discosoma* sp. *Molecular Ecology*  
443 *Resources* 2017; 17(6); 187-195.
- 444 55. Baumgarten E, Simakov O, Esherick LY et al. National Center for Biotechnology  
445 Information, (*Ex*)*aiptasia pallida* genome Version 1.1  
446 [ftp://ftp.ncbi.nlm.nih.gov/sra/wgs\\_aux/LJ/WW/LJWW01/LJWW01.1.fsa\\_nt.gz](ftp://ftp.ncbi.nlm.nih.gov/sra/wgs_aux/LJ/WW/LJWW01/LJWW01.1.fsa_nt.gz) (August  
447 7 2018, date last accessed).
- 448 56. Baumgarten S, Simakov O, Esherick LY et al. The genome of *Aiptasia*, a sea anemone  
449 model for coral symbiosis. *Proceedings of the National Academy of Sciences*  
450 2015;112(38):11893-11898.
- 451 57. Matz Lab. *Montastraea cavernosa* genome. Jul 2018 version.  
452 <https://matzlab.weebly.com/data--code.html> (August 7, 2018, date last accessed).

- 453 58. Kayal E, Bentlage B, Pankey MS et al. Phylogenomics provides a robust topology of the  
454 major cnidarian lineages and insights on the origins of key organismal traits. BMC  
455 Evolutionary Biology 2018;18:68.
- 456 59. Kayal E, Roure B, Phillipe H et al. Cnidarian phylogenetic relationships as revealed by  
457 mitogenomics. BMC Evolutionary Biology, 2013;13:5.
- 458 60. Jiang J, Quattrini AM, Francis WR, et al. A hybrid de novo assembly of the sea pansy  
459 (*Renilla muelleri*) genome. GigaScience Database 2018. doi:XXXXXX
- 460 61. Liew YJ, Aranda M, Voolstra CR. Reefgenomics.Org - a repository for marine genomics  
461 data. Database (Oxford) 2016, 1–4 *Renilla muelleri* genome <http://rmue.reefgenomics.org>  
462 (August 7, 2018, date last accessed)

463

464

465

466

467

468

469

470

471

472

473

474

475 **Figure Captions**

476 **Figure 1.** BUSCO-generated chart showing relative completeness of six hexacoral genomes, one

477 octocoral genome, and the *Renilla muelleri* assembly.

478

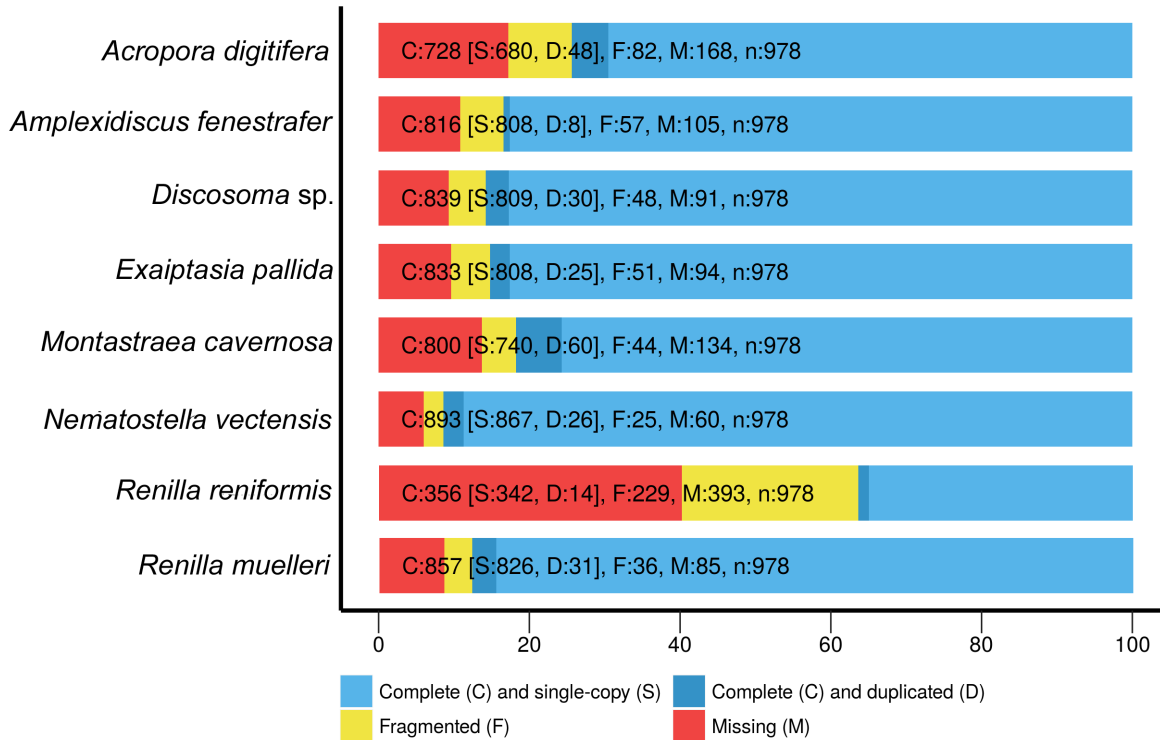

487 **Table 1.** General statistics and BUSCO-completeness of both initial hybrid assemblies and the  
 488 final hybrid assembly.

|                               | MaSuRCA hybrid | SPAdes hybrid  | Final MaSuRCA hybrid |
|-------------------------------|----------------|----------------|----------------------|
| scaffold total                | 4,984          | 725,809        | 4,925                |
| contig total                  | 5,263          | 725,809        | 5,196                |
| scaffold sequence total       | 172,512,580    | 231,255,108    | 172,160,214          |
| contig sequence total         | 172.472 Mb     | 231.255 Mb     | 172.091 Mb           |
| scaffold L/N50                | 635/70.423 Kb  | 33702/1.007 Kb | 633/70.522 Kb        |
| contig L/N50                  | 687/64.492 Kb  | 33702/1.007 Kb | 684/64.781 Kb        |
| Max scaffold /contig length   | 513.145 Kb     | 323.009 Kb     | 513.151 Kb           |
| Number of scaffolds > 50 Kb   | 960            | 14             | 961                  |
| % genome in scaffolds > 50 Kb | 61.07%         | 0.95%          | 61.23%               |
| GC%                           | 36.18%         | 36.97%         | 36.17%               |
| N%                            | 0.042%         | 0.000%         | 0.040%               |
| BUSCO assessment:             |                |                |                      |
| Complete                      | 858 (87.73%)   | 508 (51.94%)   | 857 (87.63%)         |
| Complete and single-copy      | 826 (84.46%)   | 493 (50.41%)   | 826 (84.46%)         |
| Complete and Duplicated       | 32 (3.27%)     | 15 (1.53%)     | 31 (3.17%)           |
| Fragmented                    | 36 (3.68%)     | 200 (20.45%)   | 36 (3.68%)           |
| Missing                       | 84 (8.59%)     | 270 (27.61%)   | 85 (8.69%)           |

489 Unmerged haplotypes were removed in the final assembly, which was also error-corrected with  
 490 Pilon.  
 491

492 **Table 2.** Statistics for the gene model predicted by Augustus.

|                          | Number       |
|--------------------------|--------------|
| Genes                    | 23,660       |
| Exons                    | 140,384      |
| Introns                  | 117,838      |
| Average Exon Length      | 249          |
| Exons Per Gene           | 5.93         |
| Average Intron Length    | 524          |
| Introns Per Gene         | 4.98         |
| BUSCO assessment:        |              |
| Complete                 | 830 (84.87%) |
| Complete and single-copy | 798 (81.60%) |
| Complete and Duplicated  | 32 (3.27%)   |
| Fragmented               | 64 (6.54%)   |
| Missing                  | 84 (8.59%)   |

493  
494  
495  
496  
497  
498  
499  
500  
501  
502  
503  
504  
505  
506  
507  
508  
509  
510  
511  
512  
513



514 **Supplemental Table S1. Summary of Pilon changes per iteration**

515

---

|                                              | First<br>Iteration   | Second<br>Iteration  | Third<br>Iteration   | Fourth<br>Iteration | Fifth<br>Iteration | Sixth<br>Iteration |
|----------------------------------------------|----------------------|----------------------|----------------------|---------------------|--------------------|--------------------|
| Single-nucleotide<br>polymorphism<br>changes | 32,292               | 10,039               | 4,688                | 2,790               | 1,697              | 1,152              |
| Ambiguous bp                                 | 567                  | 199                  | 99                   | 50                  | 41                 | 26                 |
| Small Insertions                             | 9,180<br>(54,855 bp) | 1,982<br>(15,381 bp) | 1,231<br>(14,443 bp) | 858<br>(11,391 bp)  | 810 (12,777<br>bp) | 641 (10,596<br>bp) |
| Small Deletions                              | 6706<br>(41,808 bp)  | 1,925<br>(16,566 bp) | 1038<br>(11,922 bp)  | 848<br>(12,916 bp)  | 640 (10,603<br>bp) | 684 (12,319<br>bp) |

---

516

517

518

519

520

521

522

523

524

525

526

527

528

529

530 **Supplemental Table S2.** *Renilla muelleri* genome assembly and annotation comparisons to  
531 other anthozoan genomes.

|                                      | Genome Size<br>(Mb) | Total #<br>Complete<br>BUSCOs** | Contig N50<br>(KB) | Exon length<br>(bp) | # Predicted<br>Gene models |
|--------------------------------------|---------------------|---------------------------------|--------------------|---------------------|----------------------------|
| <i>Acropora digitifera</i>           | 420                 | 728                             | 10.6               | 230                 | 23,668                     |
| <i>Amplexidiscus<br/>fenestrafer</i> | 350                 | 816                             | 20.0               | 218                 | 21,372                     |
| <i>Discosoma</i> sp.                 | 428                 | 839                             | 18.7               | 226                 | 23,199                     |
| <i>Exaiptasia pallida</i>            | 256                 | 833                             | 14.4               | NA                  | 26,042                     |
| <i>Montastraea<br/>cavernosa</i>     | 448                 | 800                             | 343                | NA                  | 30,360                     |
| <i>Nematostella<br/>vectensis*</i>   | 329                 | 893                             | 19.8               | 208                 | 27,273                     |
| <i>Renilla reniformis</i>            | 132                 | 356                             | 1.8                | NA                  | 12,689                     |
| <i>Renilla muelleri</i>              | 172                 | 857                             | 64.8               | 249                 | 23,360                     |

532

533 \* Data taken from [52] and [56]

534 \*\*Complete BUSCOs generated from analysis herein
